# Supplementary material for: The Variation in Chemical Composition and Source Apportionment of PM2.5 before, during, and after COVID-19 Restrictions in Zhengzhou, China
Source: MDPI journal article supplement (doi:10.3390/toxics12010081), 2024-01-17
Supplement: s1 [file s1]

# Supplementary Materials: The Variation in Chemical Composition and Source Apportionment of PM<sub>2.5</sub> before, during, and after COVID-19 Restrictions in Zhengzhou, China

Jinting Huang, Aomeng Cai, Weisi Wang, Kuan He, Shuangshuang Zou and Qingxia Ma

## Positive matrix factorization (PMF)

Positive matrix factor analysis model (US EPA PMF 5.0) was used to analyze the sources of chemical components in PM<sub>2.5</sub>. PMF is a multivariate receptor model, assuming that the concentration of PM<sub>2.5</sub> components at the receptor is a linear combination of pollution source contributions. Equation based uncertainty includes detection limits and error scores. If the concentration is less than or equal to the detection limit (MDL), the uncertainty (UNC) is calculated using the following formula:

$$UNC = 5/6 \times MDL$$

If the concentration is greater than MDL, the formula is:

$$UNC = \sqrt{(\text{ErrorFraction} \times \text{concentration})^2 + (0.5 \times MDL)^2}$$

Q<sub>true</sub>/Q<sub>exp</sub> is an indicator of the optimal solution. To find the optimal factor number, it was tested from 3 to 7. if the Q<sub>true</sub>/Q<sub>exp</sub> number approaches 1, indicating the optimal factor number is properly estimated. The Q<sub>true</sub>/Q<sub>exp</sub> approached 1 for the six factor solution in this study. In addition, the error fraction in the PMF analysis was set to 10% for the elements. More details about PMF running and result diagnosis can be found elsewhere ( Zheng et al., 2020) .

Zheng, H., Kong, S., Chen, N., Yan, Y., Liu, D., Zhu, B., Xu, K., Cao, W., Ding, Q., Lan, B., Zhang, Z., Zheng, M., Fan, Z., Cheng, Y., Zheng, S., Yao, L., Bai, Y., Zhao, T., Qi, S. Significant changes in the chemical compositions and sources of PM<sub>2.5</sub> in Wuhan since the city lockdown as Covid-19. *Sci. Total Environ* 2020, 739, 140000.31.

**Table S1.** Average mass concentrations (μg m<sup>-3</sup>) of air pollutants and species in PM<sub>2.5</sub> in 2019, 2020 and 2021.

| Species                       | 2019           | 2020          | 2021           |
|-------------------------------|----------------|---------------|----------------|
| PM <sub>2.5</sub>             | 102.49 ± 70.33 | 73.24 ± 50.88 | 73.90 ± 57.56  |
| PM <sub>10</sub>              | 148.49 ± 76.95 | 92.26 ± 59.21 | 132.34 ± 73.92 |
| SO <sub>2</sub>               | 14.90 ± 6.11   | 10.67 ± 3.86  | 13.89 ± 3.44   |
| NO <sub>x</sub>               | 67.29 ± 80.47  | 25.32 ± 14.58 | 52.45 ± 55.72  |
| NO                            | 24.89 ± 49.49  | 2.47 ± 3.03   | 10.44 ± 23.69  |
| O <sub>3</sub>                | 46.70 ± 26.27  | 58.24 ± 22.30 | 56.75 ± 29.74  |
| NO <sub>3</sub> <sup>-</sup>  | 22.93 ± 15.14  | 20.69 ± 17.60 | 23.00 ± 24.23  |
| NH <sub>4</sub> <sup>+</sup>  | 13.69 ± 8.86   | 13.00 ± 9.67  | 11.37 ± 11.03  |
| SO <sub>4</sub> <sup>2-</sup> | 15.25 ± 11.40  | 16.56 ± 12.08 | 10.84 ± 10.68  |
| K <sup>+</sup>                | 2.03 ± 3.78    | 1.25 ± 1.22   | 1.47 ± 2.15    |
| Cl <sup>-</sup>               | 3.84 ± 3.95    | 2.45 ± 1.89   | 2.79 ± 2.01    |
| OC                            | 12.71 ± 7.42   | 8.97 ± 4.50   | 7.93 ± 4.46    |
| EC                            | 3.64 ± 2.77    | 2.76 ± 1.85   | 3.09 ± 1.75    |
| SOR                           | 0.33 ± 0.23    | 0.46 ± 0.20   | 0.28 ± 0.20    |
| NOR                           | 0.25 ± 0.17    | 0.35 ± 0.18   | 0.27 ± 0.19    |

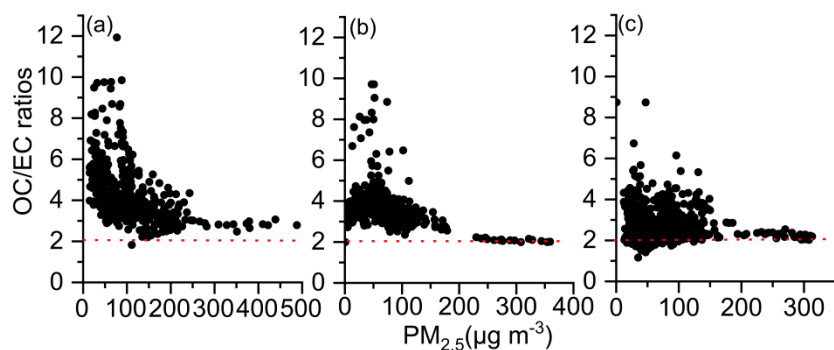

**Figure S1.** The OC/EC ratios in 2019 (a), 2020 (b) and 2021(c).

**Table S2.** Correlation analysis between  $\text{NO}_3^-$ ,  $\text{PM}_{2.5}$ , T, RH and NOR in 2019-2021(Pearson correlation coefficients)

|                   | $\text{NO}_3^-$ |         |         |
|-------------------|-----------------|---------|---------|
|                   | 2019            | 2020    | 2021    |
| $\text{PM}_{2.5}$ | 0.828*          | 0.931*  | 0.959*  |
| T                 | -0.041          | -0.177* | -0.311* |
| RH                | 0.346*          | 0.314*  | 0.472*  |
| NOR               | 0.135*          | 0.684*  | 0.480*  |

(\*:  $p < 0.01$ )

**Table S3.** Correlation analysis between  $\text{SO}_4^{2-}$ ,  $\text{PM}_{2.5}$ , T, RH and SOR in 2019-2021(Pearson correlation coefficients)

|                   | $\text{SO}_4^{2-}$ |         |         |
|-------------------|--------------------|---------|---------|
|                   | 2019               | 2020    | 2021    |
| $\text{PM}_{2.5}$ | 0.750*             | 0.896*  | 0.931*  |
| T                 | -0.143*            | -0.215* | -0.282* |
| RH                | 0.602*             | 0.376*  | 0.674*  |
| SOR               | 0.873*             | 0.740*  | 0.847*  |

(\*:  $p < 0.01$ )

**Table S4.** Correlation analysis between conversion ratios (NOR and SOR), RH,  $\text{O}_3$  and  $\text{O}_3/\text{O}_x$  in 2019-2021(Pearson correlation coefficients)

|                         | NOR     |         |        | SOR    |         |         |
|-------------------------|---------|---------|--------|--------|---------|---------|
|                         | 2019    | 2020    | 2021   | 2019   | 2020    | 2021    |
| $\text{PM}_{2.5}$       | -0.030  | 0.709*  | 0.501* | 0.269* | 0.669*  | 0.744*  |
| RH                      | 0.200*  | 0.457*  | 0.659* | 0.626* | 0.707*  | 0.803*  |
| T                       | -0.367* | -0.243* | -0.048 | -0.050 | -0.379* | -0.239* |
| $\text{O}_3$            | 0.312*  | 0.161*  | 0.379* | -0.016 | -0.279* | -0.045  |
| $\text{O}_3/\text{O}_x$ | 0.465*  | 0.217*  | 0.450* | -0.012 | -0.298* | 0.058   |

(\*:  $p < 0.01$ )

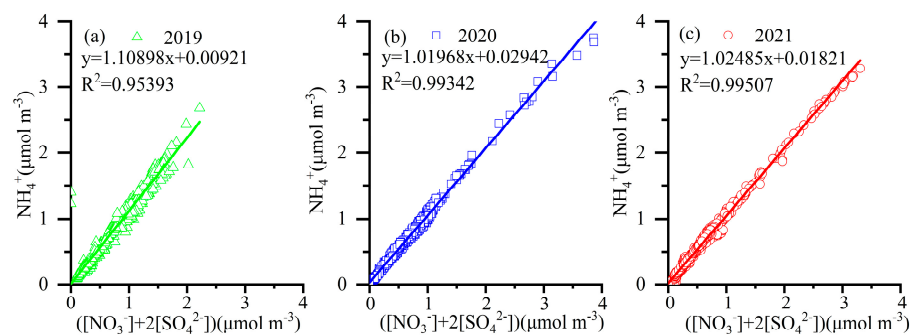

**Figure S2.** NOR and SOR with  $O_3$  in 2019, 2020 and 2021.

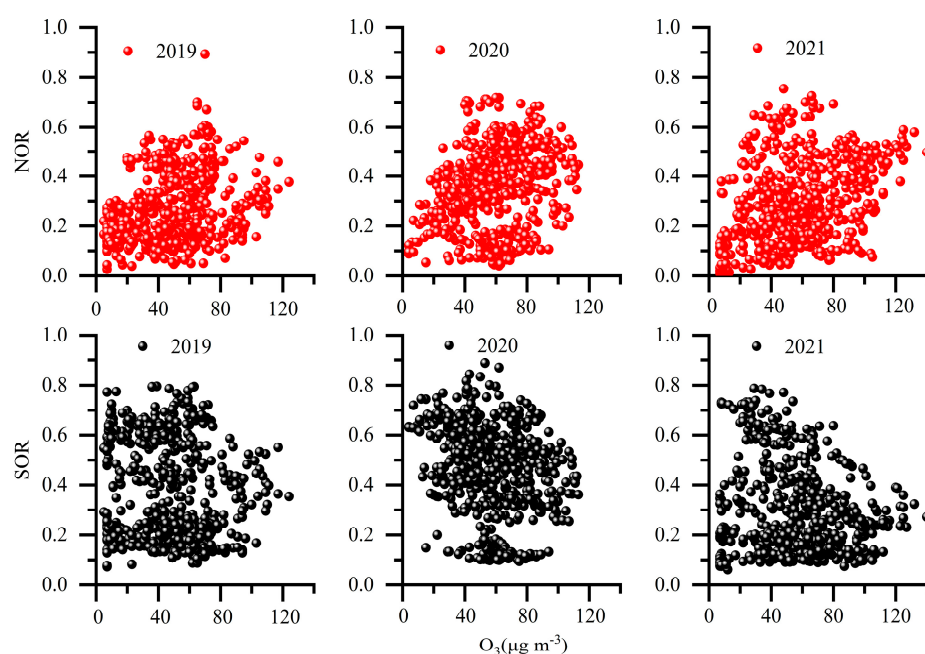

**Figure S3.** NOR and SOR with  $O_3$  in 2019, 2020 and 2021.

**Table S5.** Average contributions (%) of six sources to  $PM_{2.5}$  in 2019, 2020 and 2021.

| Sources             | 2019  | 2020  | 2021  |
|---------------------|-------|-------|-------|
| Secondary process   | 42.04 | 55.36 | 54.98 |
| Coal combustion     | 28.47 | 31.34 | 15.78 |
| Biomass burning     | 7.08  | 3.81  | 10.39 |
| Traffic emission    | 6.43  | 4.88  | 4.34  |
| Industrial emission | 3.39  | 2.37  | 10.20 |
| Dust                | 1.82  | 2.23  | 4.32  |

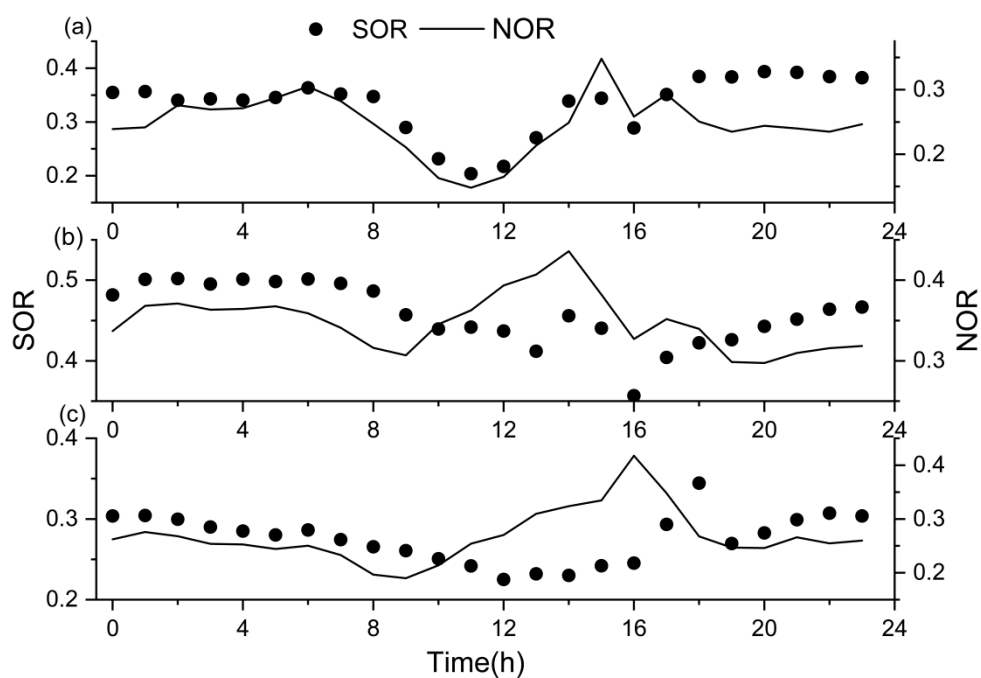

**Figure S4.** The diurnal variations of NOR and SOR in 2019 (a), 2020 (b) and 2021 (c).

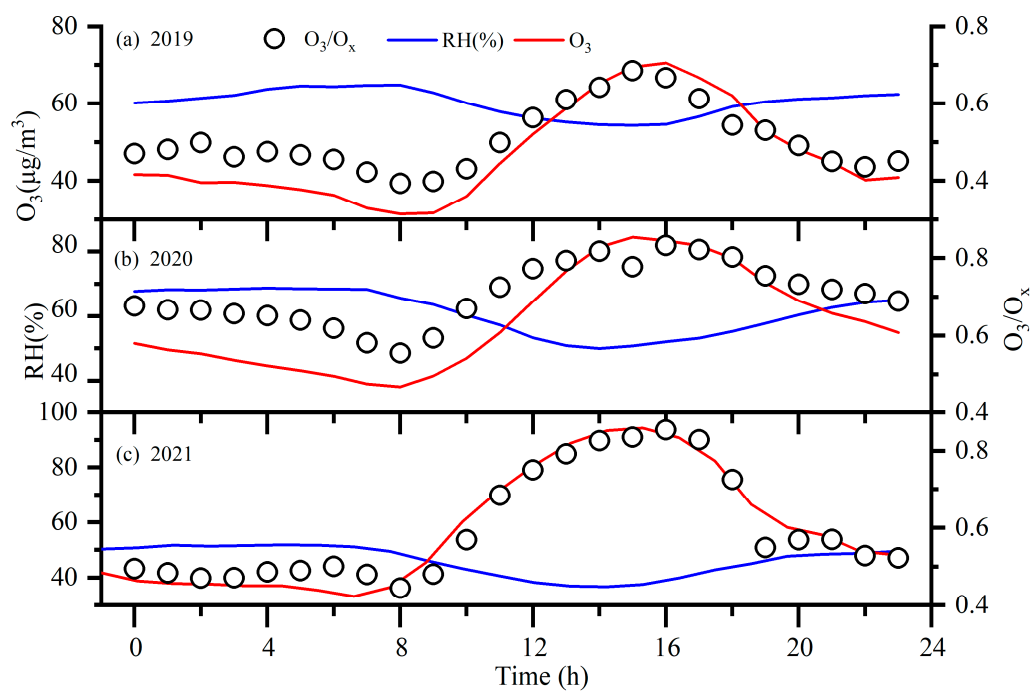

**Figure S5.** The diurnal variations of RH, O<sub>3</sub> and O<sub>3</sub>/O<sub>x</sub> in 2019 (a), 2020 (b) and 2021(c).

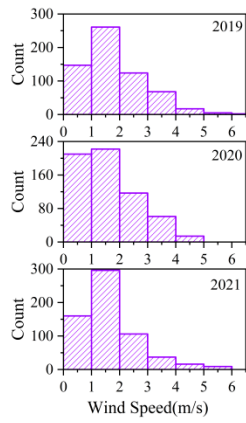

**Figure S6.** Statistical analysis of wind speed in 2019-2021.
